# Supplementary material for: Noninvasive Digital Detection of Fetal DNA in Plasma of 4-Week-Pregnant Women following In Vitro Fertilization and Embryo Transfer
Source: PubMed Central journal article supplement (PMC4430227; doi:10.1371/journal.pone.0126501), 2015-05-13

Supporting Information File 2.

S2A Fig.

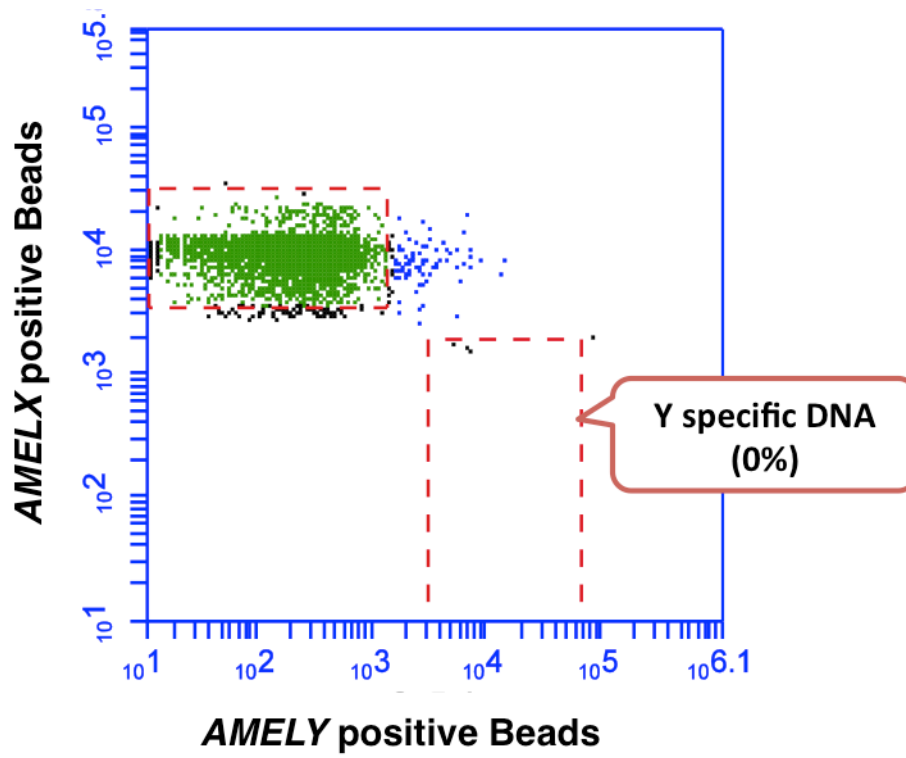

S2B Fig.

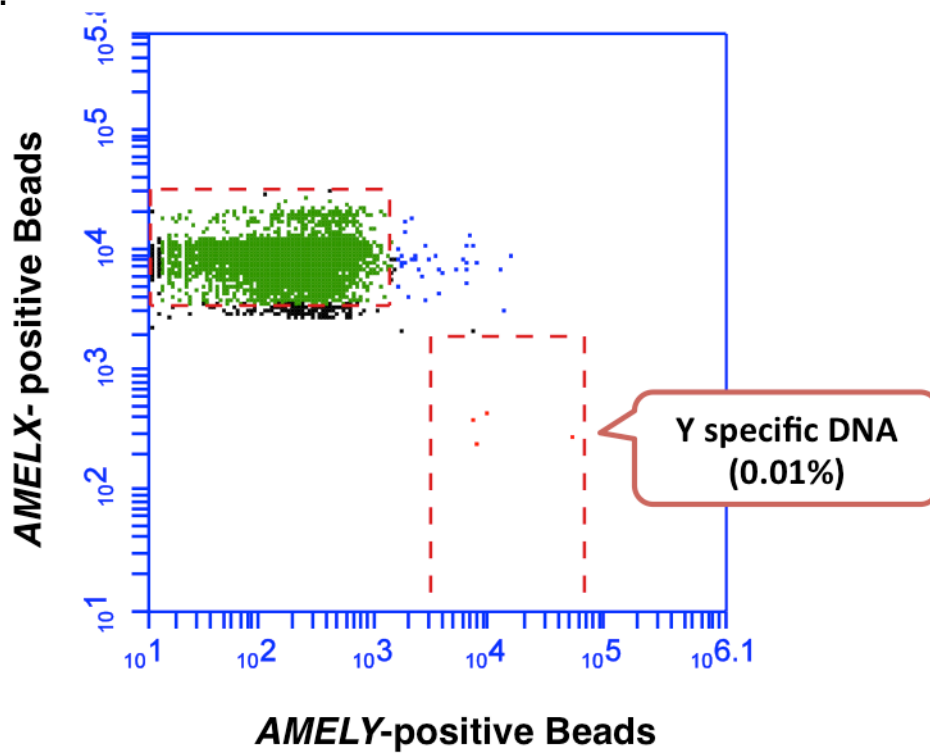

S2C Fig.

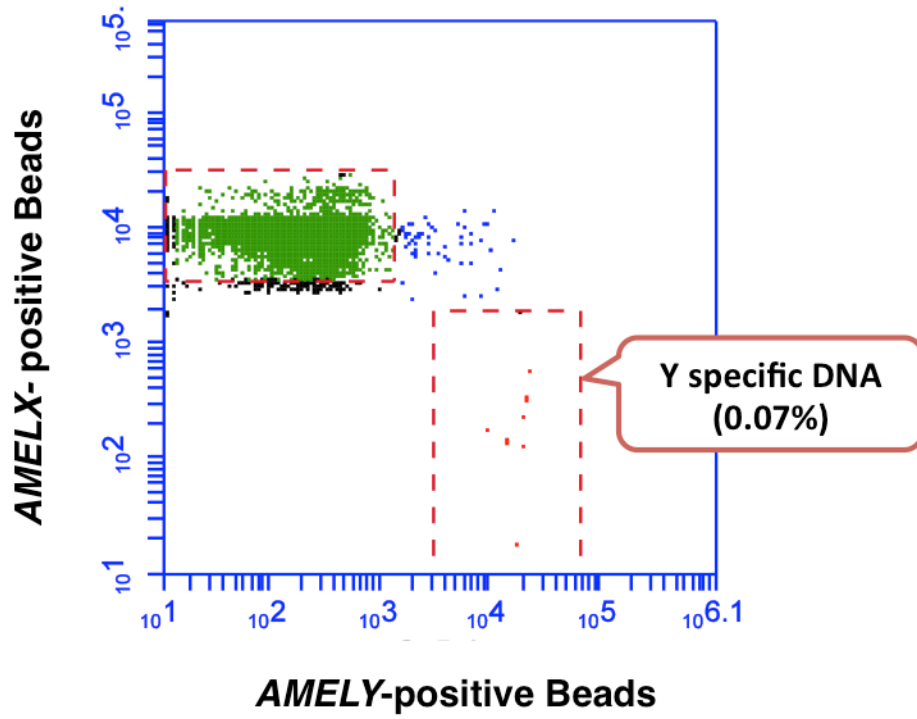

S2D Fig.

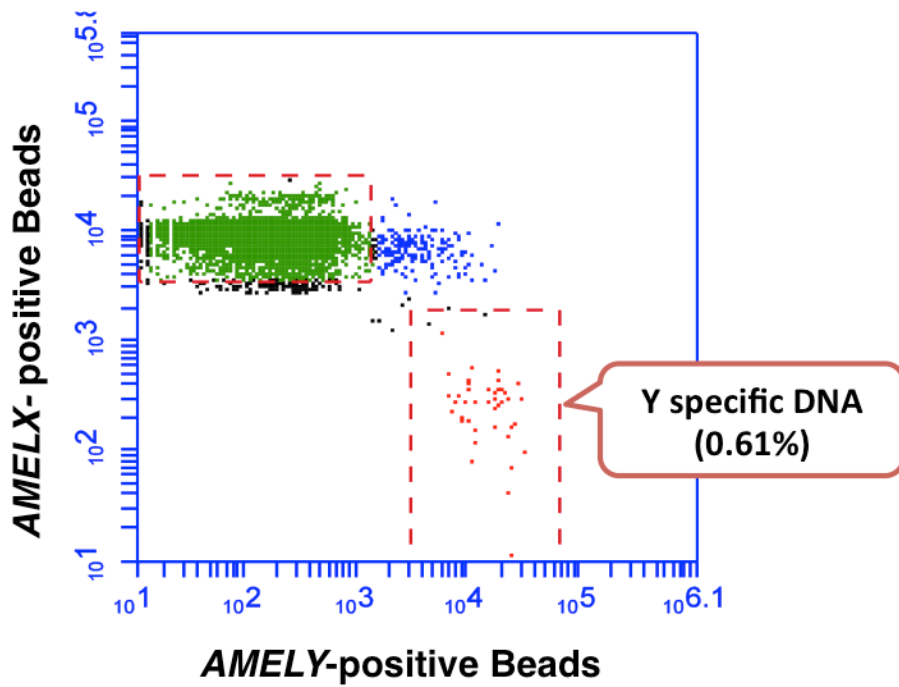

S2E Fig.

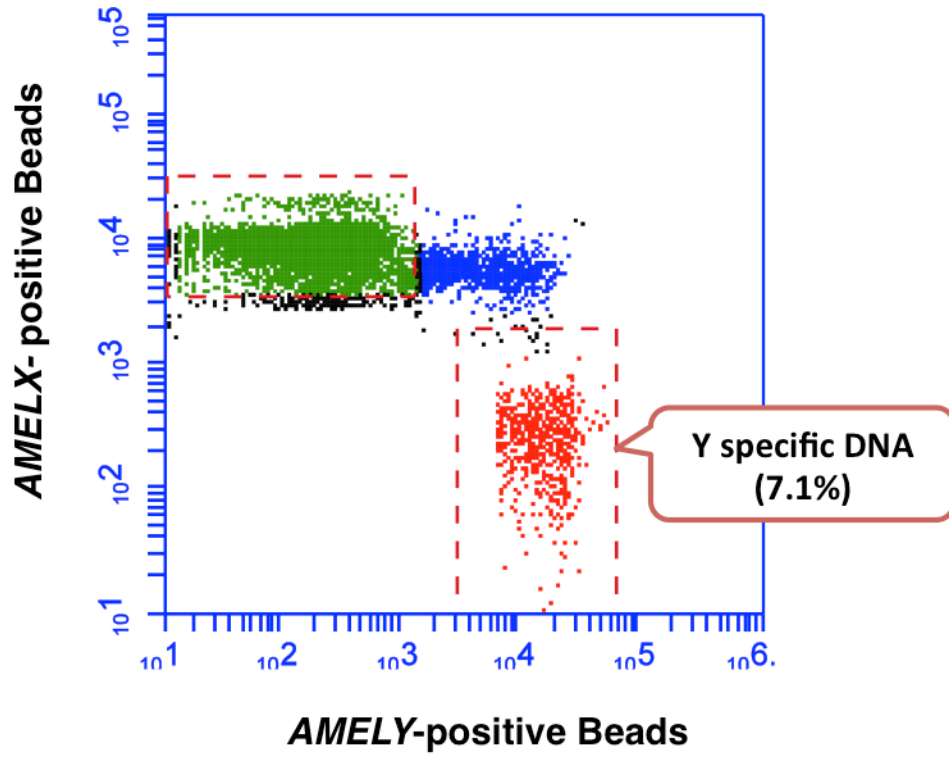

Supplement: pone.0126501.s002.pdf [file pone.0126501.s002.pdf]
